# Supplementary material
Source: Springer Nature journal article supplement (https://www.springerprofessional.de/resource/supplementary/13638_2011_314_MOESM9_ESM.pdf/11897560)
Supplement: MOESM9 [file 11897560]

Source  
address

Destination  
address

Destination  
sequence  
address

Hop  
count

Path metric

Lifetime
